# Supplementary material for: Contrasting hydrological and thermal intensities determine seasonal lake-level variations – a case study at Paiku Co on the southern Tibetan Plateau
Source: Copernicus journal article supplement (doi:10.5194/hess-25-3163-2021), 2021-06-10
Supplement: Supplementary file 1 [file hess-25-3163-2021-supplement.pdf]

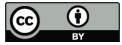

*Supplement of*

## **Contrasting hydrological and thermal intensities determine seasonal lake-level variations – a case study at Paiku Co on the southern Tibetan Plateau**

**Yanbin Lei et al.**

*Correspondence to:* Yanbin Lei (leiyb@itpcas.ac.cn)

The copyright of individual parts of the supplement might differ from the article licence.

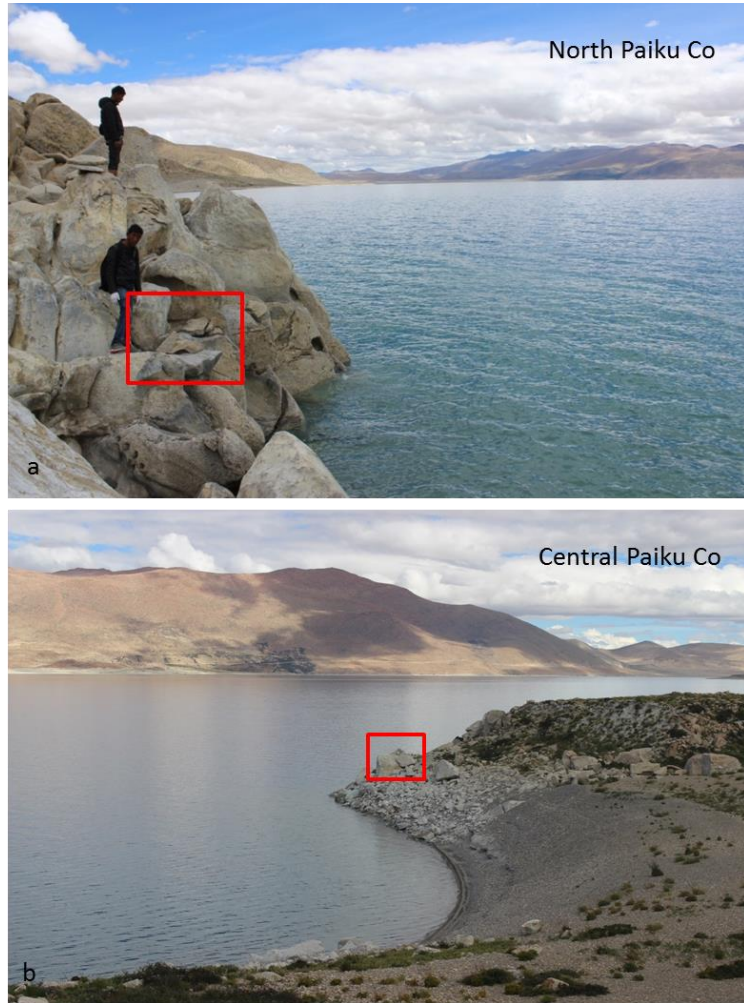

**Figure S1:** The monitoring site of air temperature and humidity at Paiku Co's shoreline of. a: The north shoreline. b: The central shoreline.

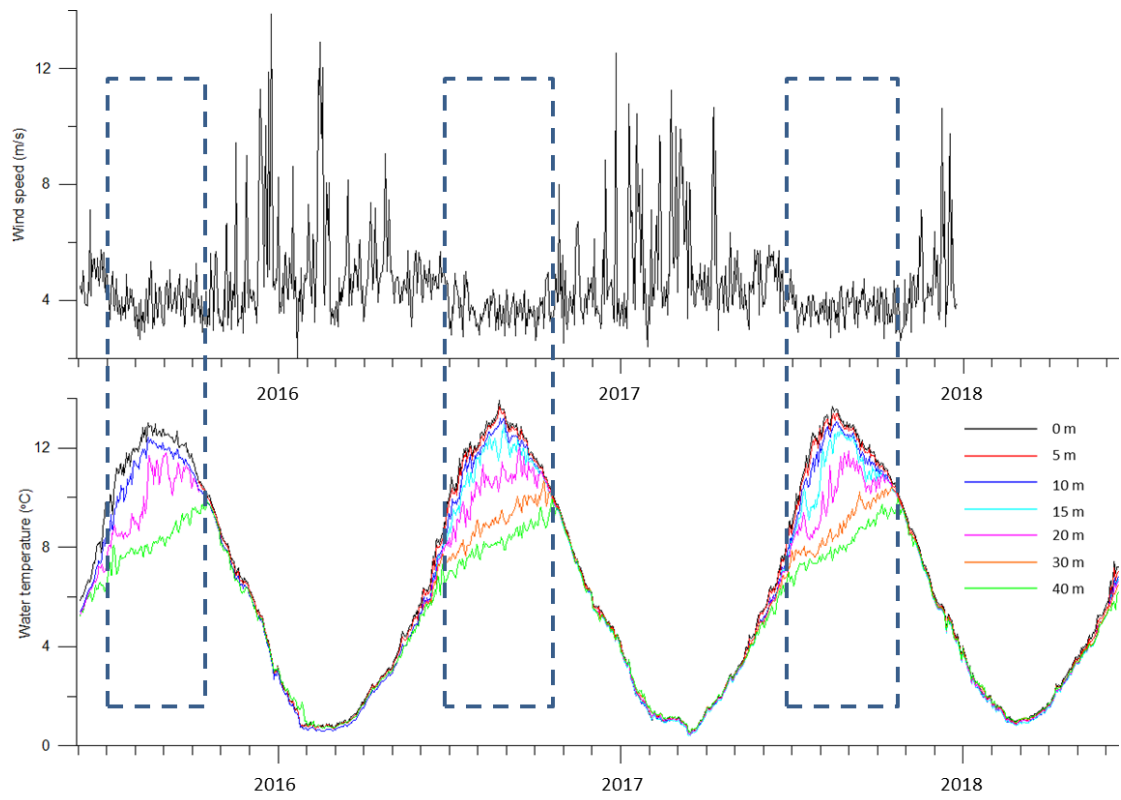

**Figure S2:** Comparison of lake water temperature and daily wind speed. Daily wind speed at Qomolangma station is used.

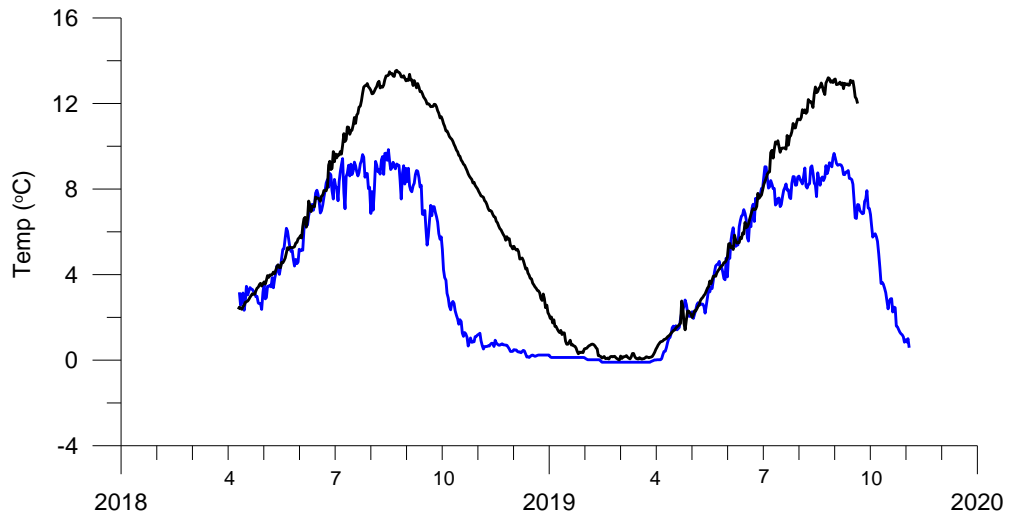

**Figure S3:** Comparison of water temperature ( $^{\circ}\text{C}$ ) between Bulaqu river (blue line) and Paik Co (black line). Lake surface temperature at southern Paiku Co is used.

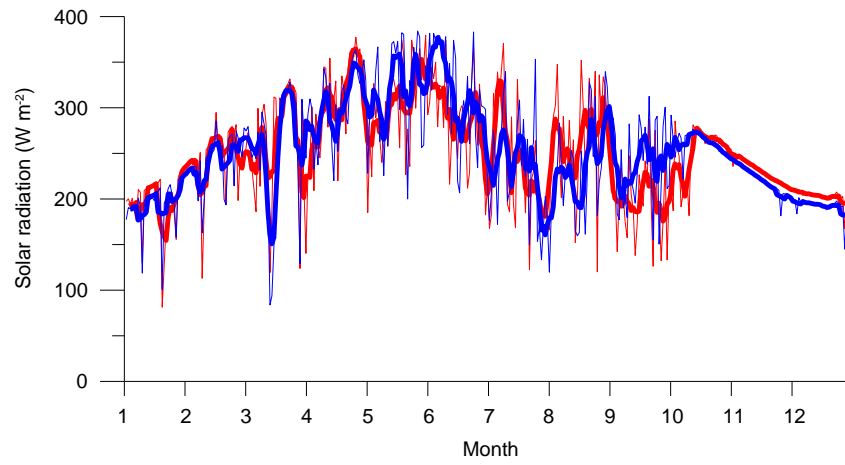

**Figure S4:** Comparison of daily solar radiation at Paiku Co and Qomolangma Station. The solar radiation at the two sites is derived from Hamawari-8 data (Tang et al., 2019).

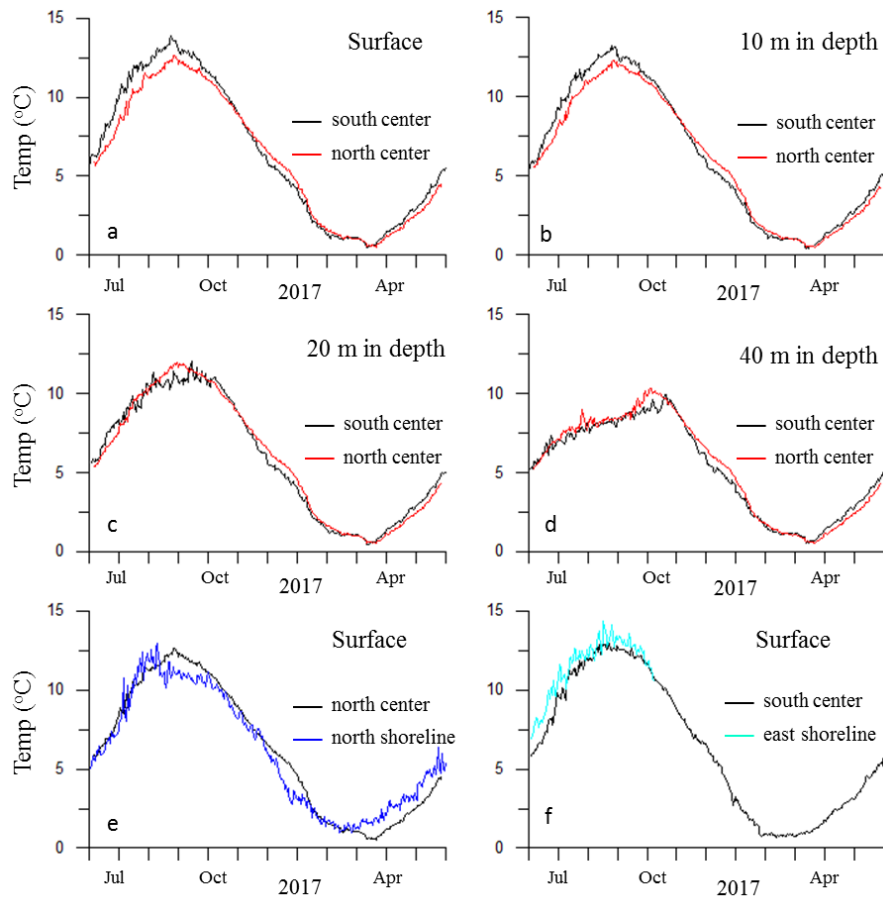

**Figure S5:** Comparison of water temperature at different sites of Paiku Co. a-d: Comparison of water temperature at the depth of 0 m, 10 m, 20 m and 40 m between the southern and northern center of Paiku Co. e-f: Comparison of water temperature between lake center and shoreline.
